# Supplementary material
Source: PubMed Central journal article supplement (PMC4480421)
Supplement: NIHMS686151-supplement-supll_file.pdf [file NIHMS686151-supplement-supll_file.pdf]

**Supplemental box 1 | Reported studies with Pan-CDK inhibitors****Flavopiridol***Targets: CDK1, CDK2, CDK4, CDK6, CDK7 and CDK9***Phase 1 clinical trials:****2014:**

A phase I trial of flavopiridol in relapsed multiple myeloma<sup>1</sup>  
 Flavopiridol can be safely administered using a pharmacologically derived schedule and demonstrates activity in relapsed and refractory non-Hodgkin's lymphoma<sup>2</sup>

**2013:**

Cyclophosphamide, alvocidib (flavopiridol), and rituximab (CAR), a novel feasible chemoimmunotherapy regimen for patients with high-risk chronic lymphocytic leukemia<sup>3</sup>  
 A phase I trial of vorinostat and alvocidib in patients with relapsed, refractory, or poor prognosis acute leukemia, or refractory anemia with excess blasts-2<sup>4</sup>

**2012:**

A dose-finding, pharmacokinetic and pharmacodynamic study of a novel schedule of flavopiridol in patients with advanced solid tumors<sup>5</sup>  
 Phase I trial of the combination of flavopiridol and imatinib mesylate in patients with Bcr-Abl+ hematological malignancies<sup>6</sup>  
 The cyclin-dependent kinase inhibitor flavopiridol potentiates doxorubicin efficacy in advanced sarcomas: preclinical investigations and results of a phase I dose-escalation clinical trial<sup>7</sup>

**2011:**

A phase I pharmacokinetic study of pulse-dose vorinostat with flavopiridol in solid tumors<sup>8</sup>  
 Phase 1 and pharmacokinetic study of bolus-infusion flavopiridol followed by cytosine arabinoside and mitoxantrone for acute leukemias<sup>9</sup>  
 Phase I trial of bortezomib (PS-341; NSC 681239) and alvocidib (flavopiridol; NSC 649890) in patients with recurrent or refractory B-cell neoplasms<sup>10</sup>

**2010:**

A phase I study of flavopiridol in combination with gemcitabine and irinotecan in patients with metastatic cancer<sup>11</sup>  
 Flavopiridol, fludarabine, and rituximab in mantle cell lymphoma and indolent B-cell lymphoproliferative disorders<sup>12</sup>  
 Phase I clinical and pharmacokinetic study of a novel schedule of flavopiridol in relapsed or refractory acute leukemias<sup>13</sup>  
 A phase I clinical trial of FOLFIRI in combination with the pan-cyclin-dependent kinase (CDK) inhibitor flavopiridol<sup>14</sup>

**2009:**

Clinical response and pharmacokinetics from a phase 1 study of an active dosing schedule of flavopiridol in relapsed chronic lymphocytic leukemia<sup>15</sup>  
 Phase I study of flavopiridol with oxaliplatin and fluorouracil/leucovorin in advanced solid tumors<sup>16</sup>

**2008:**

Phase I study of flavopiridol in combination with Paclitaxel and Carboplatin in patients with non-small-cell lung cancer<sup>17</sup>

**2007:**

Phase I dose-finding study of weekly docetaxel followed by flavopiridol for patients with advanced solid tumors<sup>18</sup>

**2006:**

Flavopiridol administered using a pharmacologically derived schedule is associated with marked clinical efficacy in refractory, genetically high-risk chronic lymphocytic leukemia<sup>19</sup>

Flavopiridol in patients with relapsed or refractory multiple myeloma: a phase 2 trial with clinical and pharmacodynamic end-points<sup>20</sup>

A phase I study of flavopiridol and docetaxel<sup>21</sup>

**2005:**

Flavopiridol administered as a 24-hour continuous infusion in chronic lymphocytic leukemia lacks clinical activity<sup>22</sup>

A phase I clinical trial of the sequential combination of irinotecan followed by flavopiridol<sup>23</sup>

Phase 1 trial of flavopiridol combined with cisplatin or carboplatin in patients with advanced malignancies with the assessment of pharmacokinetic and pharmacodynamic end points<sup>24</sup>

Phase I and pharmacokinetic study of flavopiridol followed by 1-beta-D-arabinofuranosylcytosine and mitoxantrone in relapsed and refractory adult acute leukemias<sup>25</sup>

Phase I clinical and pharmacokinetic study of flavopiridol in children with refractory solid tumors: a Children's Oncology Group Study<sup>26</sup>

**2004:**

Phase I trial of the cyclin-dependent kinase inhibitor flavopiridol in combination with docetaxel in patients with metastatic breast cancer<sup>27</sup>

**2003:**

Clinical pharmacology and pharmacogenetics of flavopiridol 1-h i.v. infusion in patients with refractory neoplasms<sup>28</sup>

Flavopiridol-related proinflammatory syndrome is associated with induction of interleukin-6<sup>29</sup>

**2002:**

Phase I clinical and pharmacokinetic trial of the cyclin-dependent kinase inhibitor flavopiridol<sup>30</sup>

Phase I clinical and pharmacokinetic study of flavopiridol administered as a daily 1-hour infusion in patients with advanced neoplasms<sup>31</sup>

Phase I study of the cyclin-dependent kinase inhibitor flavopiridol in combination with paclitaxel in patients with advanced solid tumors<sup>32</sup>

**2000:**

Flavopiridol, a novel cyclin-dependent kinase inhibitor, in metastatic renal cancer: a University of Chicago Phase II Consortium study<sup>33</sup>

**1998:**

Phase I trial of continuous infusion flavopiridol, a novel cyclin-dependent kinase inhibitor, in patients with refractory neoplasms<sup>34</sup>

**Phase 2 clinical trials:****2012:**

A phase 2 trial of flavopiridol (Alvocidib) and cisplatin in platin-resistant ovarian and primary peritoneal carcinoma: MC0261<sup>35</sup>

Randomized phase II study of two schedules of flavopiridol given as timed sequential therapy with cytosine arabinoside and mitoxantrone for adults with newly diagnosed, poor-risk acute myelogenous leukemia<sup>36</sup>

**2010:**

Clinical activity of sequential flavopiridol, cytosine arabinoside, and mitoxantrone for adults with newly diagnosed, poor-risk acute myelogenous leukemia<sup>37</sup>

**2009:**

A phase II study of flavopiridol (Alvocidib) in combination with docetaxel in refractory, metastatic pancreatic cancer<sup>38</sup>

Phase II study of flavopiridol in relapsed chronic lymphocytic leukemia demonstrating high response rates in genetically high-risk disease<sup>39</sup>

**2007:**

Sequential flavopiridol, cytosine arabinoside, and mitoxantrone: a phase II trial in adults with poor-risk acute myelogenous leukemia<sup>40</sup>

**2005:**

Treatment of relapsed chronic lymphocytic leukemia by 72-hour continuous infusion or 1-hour bolus infusion of flavopiridol: results from Cancer and Leukemia Group B study 19805<sup>41</sup>

A phase II study of flavopiridol in patients with advanced renal cell carcinoma: results of Southwest Oncology Group Trial 0109<sup>42</sup>

A phase II evaluation of flavopiridol as second-line chemotherapy of endometrial carcinoma: a Gynecologic Oncology Group study<sup>43</sup>

**2004:**

A Phase II trial of flavopiridol (NSC #649890) in patients with previously untreated metastatic androgen-independent prostate cancer<sup>44</sup>

Phase II trial of flavopiridol, a cyclin dependent kinase inhibitor, in untreated metastatic malignant melanoma<sup>45</sup>

**2003:**

Flavopiridol in untreated or relapsed mantle-cell lymphoma: results of a phase II study of the National Cancer Institute of Canada Clinical Trials Group<sup>46</sup>

Phase II study of flavopiridol in patients with advanced colorectal cancer<sup>47</sup>

**2001:** A phase II trial of the cyclin-dependent kinase inhibitor flavopiridol in patients with previously untreated stage IV non-small cell lung cancer<sup>48</sup>

**2001:** Phase II study of the cyclin-dependent kinase inhibitor flavopiridol administered to patients with advanced gastric carcinoma<sup>49</sup>

**Dinaciclib***Targets: CDK1, CDK2, CDK4, CDK5, CDK6, CDK7 and CDK9***Phase 1 clinical trials:****2013:****Clinical and laboratory studies of the novel cyclin-dependent kinase inhibitor dinaciclib (SCH 727965) in acute leukemias<sup>50</sup>**

No remissions were achieved. Common AE: gastrointestinal, fatigue, transaminitis, and clinical and laboratory manifestations of tumor lysis syndrome, including one patient who died of acute renal failure. While dinaciclib given as a 2-h bolus did not exhibit durable clinical activity, pharmacokinetic and pharmacodynamic data support the exploration of prolonged infusion schedules in future trials in patients with acute leukemias.

**A first-in-human, phase 1, dose-escalation study of dinaciclib, a novel cyclin-dependent kinase inhibitor, administered weekly in subjects with advanced malignancies<sup>51</sup>**

N= 48. MAD was 14 mg/m<sup>2</sup> and the RP2D: 12 mg/m<sup>2</sup>. DLTs at the MAD included orthostatic hypotension and elevated uric acid. Common AEs: nausea, anemia, decreased appetite, and fatigue. 10 patients achieved prolonged SD for 4 ≥ cycles.

**2010:****Phase 1/2 trial of a novel CDK inhibitor dinaciclib (SCH727965) in patients with relapsed multiple myeloma demonstrates encouraging single agent activity<sup>52</sup>**

MTD: 50 mg/m<sup>2</sup> for the Phase II portion. Overall confirmed response rate was 3 of 27 (11%).

**Phase 2 clinical trials:****2014:****Randomized phase 2 study of the cyclin-dependent kinase inhibitor dinaciclib (MK-7965) versus erlotinib in patients with non-small cell lung cancer<sup>53</sup>**

Median TTP was 1.49 months (95% CI: 1.31, 2.63) following initial treatment with dinaciclib vs. 1.58 months (95% CI: 1.38, 2.83) with erlotinib. Conclusion: No single agent activity demonstrated in previously treated NSCLC.

**Randomized Phase II Trial of the Cyclin-Dependent Kinase Inhibitor Dinaciclib (MK-7965) Versus Capecitabine in Patients With Advanced Breast Cancer<sup>54</sup>**

N=30. Unplanned interim analysis showed that TTP was inferior with dinaciclib treatment compared with capecitabine treatment. Dinaciclib monotherapy demonstrated some antitumor activity, was well tolerated, efficacy was not superior to capecitabine hence study terminated early

**2010:****Phase II study of the cyclin-dependent kinase (CDK) inhibitor dinaciclib (SCH727965) in patients with advanced acute leukemias<sup>55</sup>**

N= 26 (20 AML, 6 ALL) AML patients were randomized between dinaciclib and gemtuzumab ozogamicin (GO) with cross-over to dinaciclib if no response to GO was seen, while ALL patients only received dinaciclib. Dinaciclib showed anti-leukemia activity in this heavily pre-treated patient population

**AT7519**

*TARGETS: CDK2, CDK4, CDK5, CDK9, CDK1, CDK6 and GSK3 $\beta$*

**Phase 1 clinical trials:**

**2013: A Phase I/II Open-Label Multicenter Study Of The Cyclin Kinase Inhibitor AT7519M Alone and In Combination With Bortezomib In Patients With Previously Treated Multiple Myeloma (MM)<sup>56</sup>**  
No DLTs with 2 AE  $\geq$  Grade 3 in severity (neutropenia, and dyspnea) possibly related to treatment. MTD: 21 mg/m<sup>2</sup> AT7519M and 1.3 mg/m<sup>2</sup> Bortezomib. Combination tolerated well with significant (33%  $\geq$  PR) responses in heavily pre-treated/refractory to Bortezomib.

**2011:**

**A phase I pharmacokinetic and pharmacodynamic study of AT7519, a cyclin-dependent kinase inhibitor in patients with refractory solid tumors<sup>57</sup>.**

N=28 treated. Study terminated early. DLTs at 34 mg/m(2)/day QTc prolongation with one death (grade 5), fatigue (grade 4) and mucositis (grade 3). ECG review suggested a dose-dependent increase in QTc and recruitment was discontinued without establishing a maximum tolerated dose.

**A Phase I study of AT7519M given as short infusion twice weekly<sup>58</sup>**

Refractory solid tumours, N=28 Schedule: AT7519 was administered escalating doses on days 1,4,8,11 every 3 weeks. RP2D was 27mg/m2.

DLTs: mucositis, rash, fatigue and muscle weakness, renal dysfunction and febrile neutropenia. No evidence of QTc prolongation. 9 patients with SD (2.5-11.1 months). Short AT7519M infusions are tolerable with no QTc prolongation.

**Seliciclib (Cyclacel) also known as R-roscovitine, CYC202**

*Targets: CDK1, CDK2, CDK5, CDK7 and CDK9*

**Phase 1 clinical trials:**

**2012: Phase I study of sequential sapacitabine and seliciclib in patients with advanced solid tumors<sup>59</sup>.**

N=27. MTD and RP2D is sapacitabine 50 mg bid./seliciclib 1200 mg bid. DLTs were reversible transaminase elevations and neutropenia. Common AE: anorexia, fatigue, abdominal pain, dizziness, nausea, anemia, neutropenia, creatinine elevation, hyperglycemia, hyperbilirubinemia, hypophosphatemia, hypokalemia and hypomagnesemia

**2010: Phase I evaluation of seliciclib (R-roscovitine), a novel oral cyclin-dependent kinase inhibitor, in patients with advanced malignancies<sup>60</sup>.**

N=56. DLTs: nausea, vomiting, asthenia and hypokalaemia at 1600 mg bid for schedule A and in schedule C, DLT of hypokalaemia and asthenia occurred at 1800 mg bid. Arm B was discontinued due to toxicity. 1 PR in a patient with hepatocellular carcinoma. MTD:1250 mg bid for 5d every 3 weeks. RP2D: 1600 mg bid for 3d every 2 weeks.

**2007: A phase I trial of the selective oral cyclin-dependent kinase inhibitor seliciclib (CYC202; R-Roscovitine), administered twice daily for 7 days every 21 days<sup>61</sup>.**

N=21 DLTs were seen at 800 mg bid: G3 fatigue, G3 skin rash, G3 hyponatraemia and G4 hypokalaemia. No objective tumour responses, but disease stabilisation was recorded in eight patients.

**Phase 2 clinical trials:**

**2010: APPRAISE Phase 2b study of seliciclib<sup>62</sup>** NSCLC cancer, study terminated early  
Study terminated after interim analyses suggested no difference between seliciclib arm and placebo.

**2009: A phase II randomized study of oral seliciclib in patients with previously treated nasopharyngeal carcinoma.<sup>63</sup>**

DLTs: G3 increase in ALT or AST (n=3), and treatment delay > 2 weeks for grade 1 creatinine (n=1).  
Common AE: fatigue, nausea/vomiting, constipation, cough, fever, hypokalemia, hyponatremia, and elevation in ALT/AST, most of which were mild to moderate in intensity. Interim data confirms that both dosing schedules are tolerable for proceeding to the randomized phase with SD in NPC patients.

**R547 also known as R0-4584820 (Hoffmann-La-Roche)**

*Targets: CDK1, CDK2, CDK4 AND CDK7*

**Phase 1 clinical trials:**

**2007: A phase I study of R547, a novel, selective inhibitor of cell cycle and transcriptional cyclin dependent kinases (CDKs)<sup>64</sup>**

N=41. AE: nausea (54%), fatigue (34%), emesis (34%), headache (34%), and hypotension (32%).  
DLTs for 90mins infusion: G3 somnolence, G3 confusion, G3 fatigue, 1 pt each, all at 195 mg/m<sup>2</sup>. DLTs for 180mins infusion: G3 pruritis at 195 mg/m<sup>2</sup>. R547 is tolerable at a dose of 155 mg/m<sup>2</sup> on D1, D8 (21 day cycle) for both 90 and 180 min schedules with manageable side effects.

**SNS-032, also known as BMS-387032 (Sunesis)**

*Targets: CDK2, CDK7 and CDK9*

**Phase 1 clinical trials:**

**2010: Phase I and pharmacologic study of SNS-032, a potent and selective Cdk2, 7, and 9 inhibitor, in patients with advanced chronic lymphocytic leukemia and multiple myeloma<sup>65</sup>.**

CLL cohort: N=9 DLT: Tumor lysis syndrome, MTD: 75 mg/m(2) G3/4 toxicity: myelosuppression. 1 patient had >50% reduction in measurable disease without improvement in hematologic parameters. Another patient with low tumor burden had SD for 4 courses. Multiple myeloma cohort: no DLT and MTD was not identified at up to 75 mg/m(2), owing to early study closure. 2 patients had SD, 1 had normalization of spleen size with treatment.

**2008: A phase 1 study of SNS-032 (formerly BMS-387032), a potent inhibitor of cyclin-dependent kinases 2, 7 and 9 administered as a single oral dose and weekly infusion in patients with metastatic refractory solid tumors<sup>66</sup>.**

Starting dose of 4 mg/m<sup>2</sup> intravenously administered over 1-h with a cycle defined as 3 weekly doses of SNS-032 every 21 days. N=21. Commonest AE (>20%): Fatigue (25%) and nausea (20%). 3 (15%) patients experienced a best response of SD. Study enrollment was terminated during dose-escalation due to a change in the development strategy for the study drug.

*PR=partial response; CR=complete response SD=stable disease; PD= progressive disease; MAD=maximum administered dose; RP2D=recommended phase 2 dose; AE=adverse events; TTP=time to progression; IV= intravenous infusion, CIV=continuous intravenous, B.I.D= twice daily; OS=overall survival; DLT=drug limiting toxicity; G3= grade 3; ALT=alanine transaminase; AST= aspartate transaminase; NPC= nasopharyngeal cancer.*

1. Hofmeister CC, P.M., Bowers MA, et al. A phase I trial of flavopiridol in relapsed multiple myeloma. *Cancer Chemother Pharmacol.* 2014 Feb **73**, 249-57. (2014).
2. Jones J.A, A.S.R.A.S., Poi M, et al. Flavopiridol can be safely administered using a pharmacologically derived schedule and demonstrates activity in relapsed and refractory non-Hodgkin's lymphoma. *American Journal of Hematology* **89** (2014).
3. Stephens DM, R.A., Maddocks K, et al. Cyclophosphamide, alvocidib (flavopiridol), and rituximab, a novel feasible chemoimmunotherapy regimen for patients with high-risk chronic lymphocytic leukemia. *Leuk Res.* **37**, 1195-9 (2013).
4. Holkova B, S.J., Ames MM, Reid JM, Shapiro GI, Perkins EB, Ramakrishnan V, Tombes MB, Honeycutt C, McGovern RM, Kmiecik M, Shrader E, Wellons MD, Sankala H, Doyle A, Wright J, Roberts JD, Grant S. A phase I trial of vorinostat and alvocidib in patients with relapsed, refractory, or poor prognosis acute leukemia, or refractory anemia with excess blasts-2. *Clin Cancer Res* **19**, 1873-83 (2013).
5. Ramaswamy B, P.M., Baiocchi R, et al. A dose-finding, pharmacokinetic and pharmacodynamic study of a novel schedule of flavopiridol in patients with advanced solid tumors. *Invest New Drugs.* **30**, 629-38 (2012).
6. Bose P, P.E., Honeycutt C, Wellons MD, Stefan T, Jacobberger JW, Kontopodis E, Beumer JH, Egorin MJ, Imamura CK, Douglas Figg W Sr, Karp JE, Koc ON, Cooper BW, Luger SM, Colevas AD, Roberts JD, Grant S. Phase I trial of the combination of flavopiridol and imatinib mesylate in patients with Bcr-Abl+ hematological malignancies. *Cancer Chemother Pharmacol* **69**, 1657-67. (2012).
7. Luke JJ, D.A.D., Dickson MA, Keohan ML, Carvajal RD, Maki RG, de Stanchina E, Musi E, Singer S, Schwartz GK. The cyclin-dependent kinase inhibitor flavopiridol potentiates doxorubicin efficacy in advanced sarcomas: preclinical investigations and results of a phase I dose-escalation clinical trial. *Clin Cancer Res* **18**, 2638-47. (2012).
8. Dickson MA, R.D., Carvajal RD, Grant S, Roberts JD, Reid JM, Ames MM, McGovern RM, Lefkowitz RA, Gonen M, Cane LM, Dials HJ, Schwartz GK. A phase I pharmacokinetic study of pulse-dose vorinostat with flavopiridol in solid tumors. *Invest New Drugs* **29**, 1004-12 (2011).
9. Karp JE, S.B., Resar LS, Greer JM, Blackford A, Zhao M, Moton-Nelson D, Alino K, Levis MJ, Gore SD, Joseph B, Carraway H, McDevitt MA, Bagain L, Mackey K, Briel J, Doyle LA, Wright JJ, Rudek MA. Phase 1 and pharmacokinetic study of bolus-infusion flavopiridol followed by cytosine arabinoside and mitoxantrone for acute leukemias. *Blood* **117**, 3302-10 (2011).
10. Holkova B, P.E., Ramakrishnan V, Tombes MB, Shrader E, Talreja N, Wellons MD, Hogan KT, Roodman GD, Coppola D, Kang L, Dawson J, Stuart RK, Peer C, Figg WD Sr, Kolla S, Doyle A, Wright J, Sullivan DM, Roberts JD, Grant S. Phase I trial of bortezomib (PS-341; NSC 681239) and alvocidib (flavopiridol; NSC 649890) in patients with recurrent or refractory B-cell neoplasms. *Clin Cancer Res* **17**, 3388-97 (2011).
11. Fekrazad HM, V.C., Royce M, Smith HO, Chyi Lee F, Rabinowitz I. A phase I study of flavopiridol in combination with gemcitabine and irinotecan in patients with metastatic cancer. *Am J Clin Oncol* **33**, 393-7. (2010).
12. Lin TS, B.K., Fischer DB, Mitchell SM, Ruppert AS, Porcu P, Kraut EH, Baiocchi RA, Moran ME, Johnson AJ, Schaaf LJ, Grever MR, Byrd JC. Flavopiridol, fludarabine, and rituximab in mantle cell lymphoma and indolent B-cell lymphoproliferative disorders. *J Clin Oncol* **28**, 418-23 (2010).
13. Blum W, P.M., Klisovic RB, Rozewski DM, Ni W, Albanese KA, Rovin B, Kefauver C, Devine SM, Lucas DM, Johnson A, Schaaf LJ, Byrd JC, Marcucci G, Grever MR. Phase I clinical and pharmacokinetic study of a novel schedule of flavopiridol in relapsed or refractory acute leukemias. *Haematologica* **95**, 1098-105. (2010).
14. Dickson MA, S.M., Rathkopf D, Tse A, Carvajal RD, Wu N, Lefkowitz RA, Gonen M, Cane LM, Dials HJ, Schwartz GK. A phase I clinical trial of FOLFIRI in combination with

- the pan-cyclin-dependent kinase (CDK) inhibitor flavopiridol. *Cancer Chemother Pharmacol* **66**, 1113-21 (2010).
15. Phelps MA, L.T., Johnson AJ, Hurh E, Rozewski DM, Farley KL, Wu D, Blum KA, Fischer B, Mitchell SM, Moran ME, Brooker-McEldowney M, Heerema NA, Jarjoura D, Schaaf LJ, Byrd JC, Grever MR, Dalton JT. Clinical response and pharmacokinetics from a phase 1 study of an active dosing schedule of flavopiridol in relapsed chronic lymphocytic leukemia. *Blood*. 2007 **113**, 2637-45. (2009).
  16. Rathkopf D, D.M., Feldman DR, Carvajal RD, Shah MA, Wu N, Lefkowitz R, Gonen M, Cane LM, Dials HJ, Winkelmann JL, Bosl GJ, Schwartz GK. Phase I study of flavopiridol with oxaliplatin and fluorouracil/leucovorin in advanced solid tumors. *Clin Cancer Res* **15**, 7405-11 (2009).
  17. George S, K.B., Cogswell J, Schwarzenberger P, Shapiro GI, Fidias P, Bukowski RM. Phase I study of flavopiridol in combination with Paclitaxel and Carboplatin in patients with non-small-cell lung cancer. *Clin Lung Cancer* **9**, 160-5 (2008).
  18. Fournier MN, R.D., Shah M, Patil S, O'Reilly E, Tse AN, Hudis C, Lefkowitz R, Kelsen DP, Schwartz GK. Phase I dose-finding study of weekly docetaxel followed by flavopiridol for patients with advanced solid tumors. *Clin Cancer Res* **13**, 5841-6 (2007).
  19. Byrd JC, L.T., Dalton JT, et al. Flavopiridol administered using a pharmacologically derived schedule is associated with marked clinical efficacy in refractory, genetically high-risk chronic lymphocytic leukemia. *Blood*. 2007 Jan 15; **109**, 399-404.
  20. Dispenzieri A, G.M., Lacy MQ, Geyer SM, Fitch TR, Fenton RG, Fonseca R, Isham CR, Ziesmer SC, Erlichman C, Bible KC. Flavopiridol in patients with relapsed or refractory multiple myeloma: a phase 2 trial with clinical and pharmacodynamic end-points. *Haematologica* **91**, 390-3 (2006).
  21. El-Rayes BF, G.S., Parchment R, Lorusso P, Philip PA. A phase I study of flavopiridol and docetaxel. *Invest New Drugs* **24**, 305-10 (2006).
  22. Flinn IW, B.J., Bartlett N, et al. Flavopiridol administered as a 24-hour continuous infusion in chronic lymphocytic leukemia lacks clinical activity. *Leuk Res*. 2005 Nov **29**, 1253-7. (2004).
  23. Shah MA, K.J., Motwani M, Drobnjak M, Gonen M, Yi S, Weyerbacher A, Cordon-Cardo C, Lefkowitz R, Brenner B, O'Reilly E, Saltz L, Tong W, Kelsen DP, Schwartz GK. A phase I clinical trial of the sequential combination of irinotecan followed by flavopiridol. *Clin Cancer Res*. **11**, 3836-45.
  24. Bible KC, L.J., Nelson SA, Lee YK, Reid JM, Ames MM, Isham CR, Piens J, Rubin SL, Rubin J, Kaufmann SH, Atherton PJ, Sloan JA, Daiss MK, Adjei AA, Erlichman C. Phase 1 trial of flavopiridol combined with cisplatin or carboplatin in patients with advanced malignancies with the assessment of pharmacokinetic and pharmacodynamic end points. *Clin Cancer Res*. **11**, 5935-41 (2005).
  25. Karp JE, P.A., Gojo I, Kaufmann S, Bible K, Garimella TS, Greer J, Briel J, Smith BD, Gore SD, Tidwell ML, Ross DD, Wright JJ, Colevas AD, Bauer KS. Phase I and pharmacokinetic study of flavopiridol followed by 1-beta-D-arabinofuranosylcytosine and mitoxantrone in relapsed and refractory adult acute leukemias. *Clin Cancer Res* **11**, 8403-12 (2005).
  26. Whitlock JA, K.M., Reid JM, Ruben SL, Ames MM, Owen W, Reaman G. Phase I clinical and pharmacokinetic study of flavopiridol in children with refractory solid tumors: a Children's Oncology Group Study. *J Clin Oncol*. **23**, 9179-86.
  27. Tan AR, Y.X., Berman A, Zhai S, Sparreboom A, Parr AL, Chow C, Brahim JS, Steinberg SM, Figg WD, Swain SM. Phase I trial of the cyclin-dependent kinase inhibitor flavopiridol in combination with docetaxel in patients with metastatic breast cancer. *Clin Cancer Res* **10**, 5038-47. (2004).
  28. Zhai S, S.E., Senderowicz AM, Ando Y, Headlee D, Messmann RA, Arbuck S, Murgo AJ, Melillo G, Fuse E, Figg WD. Clinical pharmacology and pharmacogenetics of flavopiridol 1-h i.v. infusion in patients with refractory neoplasms. *Anticancer Drugs* **14**, 125-35. (2003).



29. Messmann RA, U.C., Lahusen T, Kalehua A, Wasfy J, Melillo G, Ding I, Headlee D, Figg WD, Sausville EA, Senderowicz AM. Flavopiridol-related proinflammatory syndrome is associated with induction of interleukin-6. *Clin Cancer Res*. **9**, 562-70 (2003).
30. Thomas JP, T.K., Cleary JF, Bailey HH, Arzoomanian R, Alberti D, Simon K, Feierabend C, Binger K, Marnocha R, Dresen A, Wilding G. Phase I clinical and pharmacokinetic trial of the cyclin-dependent kinase inhibitor flavopiridol. *Cancer Chemother Pharmacol*. **50**, 465-72. (2002).
31. Tan AR, H.D., Messmann R, Sausville EA, Arbuck SG, Murgo AJ, Melillo G, Zhai S, Figg WD, Swain SM, Senderowicz AM. Phase I clinical and pharmacokinetic study of flavopiridol administered as a daily 1-hour infusion in patients with advanced neoplasms. *J Clin Oncol*. **20**, 4074-82. (2002).
32. Schwartz GK, O.R.E., Ilson D, Saltz L, Sharma S, Tong W, Maslak P, Stoltz M, Eden L, Perkins P, Endres S, Barazzoul J, Spriggs D, Kelsen D. Phase I study of the cyclin-dependent kinase inhibitor flavopiridol in combination with paclitaxel in patients with advanced solid tumors. *J Clin Oncol*. **20**, 2157-70 (2002).
33. Stadler WM1, V.N., Amato R, Sosman J, Taber D, Liebowitz D, Vokes EE. Flavopiridol, a novel cyclin-dependent kinase inhibitor, in metastatic renal cancer: a University of Chicago Phase II Consortium study. *J Clin Oncol*. **2000 18**, 371-5 (2000).
34. Senderowicz AM, H.D., Stinson SF, Lush RM, Kalil N, Villalba L, Hill K, Steinberg SM, Figg WD, Tompkins A, Arbuck SG, Sausville EA. Phase I trial of continuous infusion flavopiridol, a novel cyclin-dependent kinase inhibitor, in patients with refractory neoplasms. *J Clin Oncol*. **16**, 2986-99. (1998).
35. Bible KC, P.P., Oberg AL, Maples W, Groteluschen DL, Boente M, Burton JK, Gomez Dahl LC, Tibodeau JD, Isham CR, Maguire JL, Shridhar V, Kukla AK, Voll KJ, Mauer MJ, Colevas AD, Wright J, Doyle LA, Erlichman C. A phase 2 trial of flavopiridol (Alvocidib) and cisplatin in platin-resistant ovarian and primary peritoneal carcinoma: MC0261. *Gynecol Oncol* **127**, 55-62. (2012).
36. Karp JE, G.-M.E., Estey EH, Rudek MA, Smith BD, Greer JM, Drye DM, Mackey K, Dorcy KS, Gore SD, Levis MJ, McDevitt MA, Carraway HE, Pratz KW, Gladstone DE, Showel MM, Othus M, Doyle LA, Wright JJ, Pagel JM. Randomized phase II study of two schedules of flavopiridol given as timed sequential therapy with cytosine arabinoside and mitoxantrone for adults with newly diagnosed, poor-risk acute myelogenous leukemia. *Haematologica* **97**, 1736-42. (2012).
37. Karp JE, B.A., Smith BD, Alino K, Seung AH, Bolaños-Meade J, Greer JM, Carraway HE, Gore SD, Jones RJ, Levis MJ, McDevitt MA, Doyle LA, Wright JJ. Clinical activity of sequential flavopiridol, cytosine arabinoside, and mitoxantrone for adults with newly diagnosed, poor-risk acute myelogenous leukemia. *Leuk Res*. **34**, 877-82. (2010).
38. Carvajal RD, T.A., Shah MA, Lefkowitz RA, Gonen M, Gilman-Rosen L, Kortmansky J, Kelsen DP, Schwartz GK, O'Reilly EM. A phase II study of flavopiridol (Alvocidib) in combination with docetaxel in refractory, metastatic pancreatic cancer. *Pancreatology* **9**, 404-9. (2009).
39. Lin TS, R.A., Johnson AJ, Fischer B, Heerema NA, Andritsos LA, Blum KA, Flynn JM, Jones JA, Hu W, Moran ME, Mitchell SM, Smith LL, Wagner AJ, Raymond CA, Schaaf LJ, Phelps MA, Villalona-Calero MA, Grever MR, Byrd JC. Phase II study of flavopiridol in relapsed chronic lymphocytic leukemia demonstrating high response rates in genetically high-risk disease. *J Clin Oncol* **27**, 6012-8 (2009).
40. Karp JE, S.B., Levis MJ, Gore SD, Greer J, Hattenburg C, Briel J, Jones RJ, Wright JJ, Colevas AD. Sequential flavopiridol, cytosine arabinoside, and mitoxantrone: a phase II trial in adults with poor-risk acute myelogenous leukemia. *Clin Cancer Res* **13**, 4467-73 (2007).
41. Byrd JC, P.B., Gabrilove J, et al. Treatment of relapsed chronic lymphocytic leukemia by 72-hour continuous infusion or 1-hour bolus infusion of flavopiridol: results from Cancer and Leukemia Group B study 19805. *Clin Cancer Res*. **11**, 4176-81. (2005).
42. Van Veldhuizen PJ1, F.J., Lara PN Jr, Gumerlock PH, Goodwin JW, Dakhil SR, Gross HM, Flanigan RC, Crawford ED. A phase II study of flavopiridol in patients with advanced

- renal cell carcinoma: results of Southwest Oncology Group Trial 0109. *Cancer Chemother Pharmacol* **56**, 39-45. (2005).
43. Grendys EC Jr1, B.J., Burger R, Hoffman J. A phase II evaluation of flavopiridol as second-line chemotherapy of endometrial carcinoma: a Gynecologic Oncology Group study. *Gynecol Oncol.* **98**, 249-53 (2005).
  44. Liu G, G.D., Lara PN Jr, Raghavan D, Doroshow JH, Twardowski P, Kantoff P, Oh W, Kim K, Wilding G. A Phase II trial of flavopiridol (NSC #649890) in patients with previously untreated metastatic androgen-independent prostate cancer. *Clin Cancer Res* **10**, 924-8. (2004).
  45. Burdette-Radoux S, T.R., Lohmann RC, Quirt I, Ernst DS, Walsh W, Wainman N, Colevas AD, Eisenhauer EA. Phase II trial of flavopiridol, a cyclin dependent kinase inhibitor, in untreated metastatic malignant melanoma. *Invest New Drugs* **22**, 315-22 (2004).
  46. Kouroukis CT, B.A., Crump M, Eisenhauer E, Gascoyne RD, Meyer R, Lohmann R, Lopez P, Powers J, Turner R, Connors JM; National Cancer Institute of Canada Clinical Trials Group. Flavopiridol in untreated or relapsed mantle-cell lymphoma: results of a phase II study of the National Cancer Institute of Canada Clinical Trials Group. *J Clin Oncol* **21**, 1740-5. (2003).
  47. Aklilu M, K.H., Donehower RC, Mani S, Vokes EE. Phase II study of flavopiridol in patients with advanced colorectal cancer. *Ann Oncol.* **14**, 1270-3. (2003).
  48. Shapiro GI, S.J., Patterson A, Lynch C, Lucca J, Zaccarola PF, Muzikansky A, Wright JJ, Lynch TJ Jr, Rollins BJ. A phase II trial of the cyclin-dependent kinase inhibitor flavopiridol in patients with previously untreated stage IV non-small cell lung cancer. *Clin Cancer Res.* **7**, 1590-9. (2001).
  49. Schwartz GK1, I.D., Saltz L, O'Reilly E, Tong W, Maslak P, Werner J, Perkins P, Stoltz M, Kelsen D. Phase II study of the cyclin-dependent kinase inhibitor flavopiridol administered to patients with advanced gastric carcinoma. *J Clin Oncol.* **19**, 1985-92. (2001).
  50. Gojo I, S.M., Walker A, Feldman EJ, Iyer SP, Baer MR, Sausville EA, Lapidus RG, Zhang D, Zhu Y, Jou YM, Poon J, Small K, Bannerji R. Clinical and laboratory studies of the novel cyclin-dependent kinase inhibitor dinaciclib (SCH 727965) in acute leukemias. *Cancer Chemother Pharmacol* **72**, :897-908 (2013).
  51. Nemunaitis J.J, S.K.A., Kirschmeier P, et al. A first-in-human, phase 1, dose-escalation study of dinaciclib, a novel cyclin-dependent kinase inhibitor, administered weekly in subjects with advanced malignancies. *Journal of Translational Medicine* **11** (2013).
  52. Kumar SK, L.B., Chng WJ, et al. Phase 1/2 trial of a novel CDK inhibitor dinaciclib (SCH727965) in patients with relapsed multiple myeloma demonstrates encouraging single agent activity. *ASH Annual Meeting Abstracts.* 2010 **120**, 76 (2012).
  53. Stephenson JJ, N.J., Joy AA, et al. Randomized phase 2 study of the cyclin-dependent kinase inhibitor dinaciclib (MK-7965) versus erlotinib in patients with non-small cell lung cancer. *Lung Cancer* **83**, 219-23. (2014).
  54. Mita, M.M. et al. Randomized phase II trial of the cyclin-dependent kinase inhibitor dinaciclib (MK-7965) versus capecitabine in patients with advanced breast cancer. *Clin Breast Cancer* **14**, 169-76 (2014).
  55. Gojo I, W.A., Cooper M, et al. Phase II study of the cyclin-dependent kinase (CDK) inhibitor dinaciclib (SCH 727965) in patients with advanced acute leukemias. *ASH Annual Meeting Abstracts.* 2010 **116**, 3287 (2010).
  56. Raje N, H.P.N., Landau H, Richardson P.G, Rosenblatt J, Couture N, John F. Lyons JF, Langford G, and Yule M. (ASH 55TH MEETING 2013, 2013).
  57. Mahadevan D, P.R., Squires MS, Rensvold D, Kurtin S, Pretzinger C, Dragovich T, Adams J, Lock V, Smith DM, Von Hoff D, Calvert H. A phase I pharmacokinetic and pharmacodynamic study of AT7519, a cyclin-dependent kinase inhibitor in patients with refractory solid tumors. *Ann Oncol.* **22**, 2137-43 (2011).
  58. S. J. Hotte, E.X.C., L. McIntosh, H. Hirte, S. Turner, A. Jarvi, V. Lock, L. Seymour. (2011).

59. Shapiro G, K.E.L., Cleary J.M, Tolaney S, Gandhi L, Clark J.W, Wolanski A, Frame S, Rodig S.J, Chiao J.H. Phase I study of sequential sapacitabine and seliciclib in patients with advanced solid tumors. . *J Clin Oncol* **30(suppl; abstr 3053)** (2012).
60. Le Tourneau, F.S., Laurence V, Delbaldo C, Vera K, Girre V, Chiao J, Armour S, Frame S, Green SR, Gianella-Borradori A, Diéras V, Raymond E. Phase I evaluation of seliciclib (R-roscovitine), a novel oral cyclin-dependent kinase inhibitor, in patients with advanced malignancies. *Eur J Cancer* **46**, 3243-50. (2010).
61. Benson C, W.J., De Bono J, O'Donnell A, Raynaud F, Cruickshank C, McGrath H, Walton M, Workman P, Kaye S, Cassidy J, Gianella-Borradori A, Judson I, Twelves C. A phase I trial of the selective oral cyclin-dependent kinase inhibitor seliciclib (CYC202; R-Roscovitine), administered twice daily for 7 days every 21 days. *Br J Cancer*. **96**, 29-37 (2007).
62. Cyclacel. (2010).
63. Yeo W, G.B., Le Tourneau C, Green S.R, Chiao J.H, Siu L.L A phase II randomized study of oral seliciclib in patients with previously treated nasopharyngeal carcinoma. *J Clin Oncol* **27** (2009).
64. Diab S, E.S., Tan A, Frenette G, Gore L, Depinto W, Grippo J, DeMario M, Mikulski S and Papadimitrakopoulou S. A phase I study of R547, a novel, selective inhibitor of cell cycle and transcriptional cyclin dependent kinases (CDKs). *J Clin Oncol* **25**, 3528 (2007).
65. Tong WG, C.R., Plunkett W, Siegel D, Sinha R, Harvey RD, Badros AZ, Popplewell L, Coutre S, Fox JA, Mahadocon K, Chen T, Kegley P, Hoch U, Wierda WG. Phase I and pharmacologic study of SNS-032, a potent and selective Cdk2, 7, and 9 inhibitor, in patients with advanced chronic lymphocytic leukemia and multiple myeloma. *J Clin Oncol* **28**, 3015-22 (2010).
66. Heath EI, B.K., Martell RE, Adelman DC, Lorusso PM. A phase 1 study of SNS-032 (formerly BMS-387032), a potent inhibitor of cyclin-dependent kinases 2, 7 and 9 administered as a single oral dose and weekly infusion in patients with metastatic refractory solid tumors. . *Invest New Drugs*. **26**, 59-65 (2008).
